# Supplementary material for: Fluorescence probes for thiol-containing amino acids and peptides in aqueous solution
Source: Royal Society of Chemistry journal article supplement (doi:10.1039/b503772g), 2005-01-01
Supplement: b503772g.pdf [file b503772g.pdf]

## Fluorescence Probes for Thiol-Containing Amino Acids and Peptides in Aqueous Solution

Yanyan Fu<sup>†,‡</sup>, Hongxiang Li<sup>\*†</sup>, Wenping Hu<sup>\*†</sup>, Daoben Zhu<sup>\*†</sup>

Experimental section

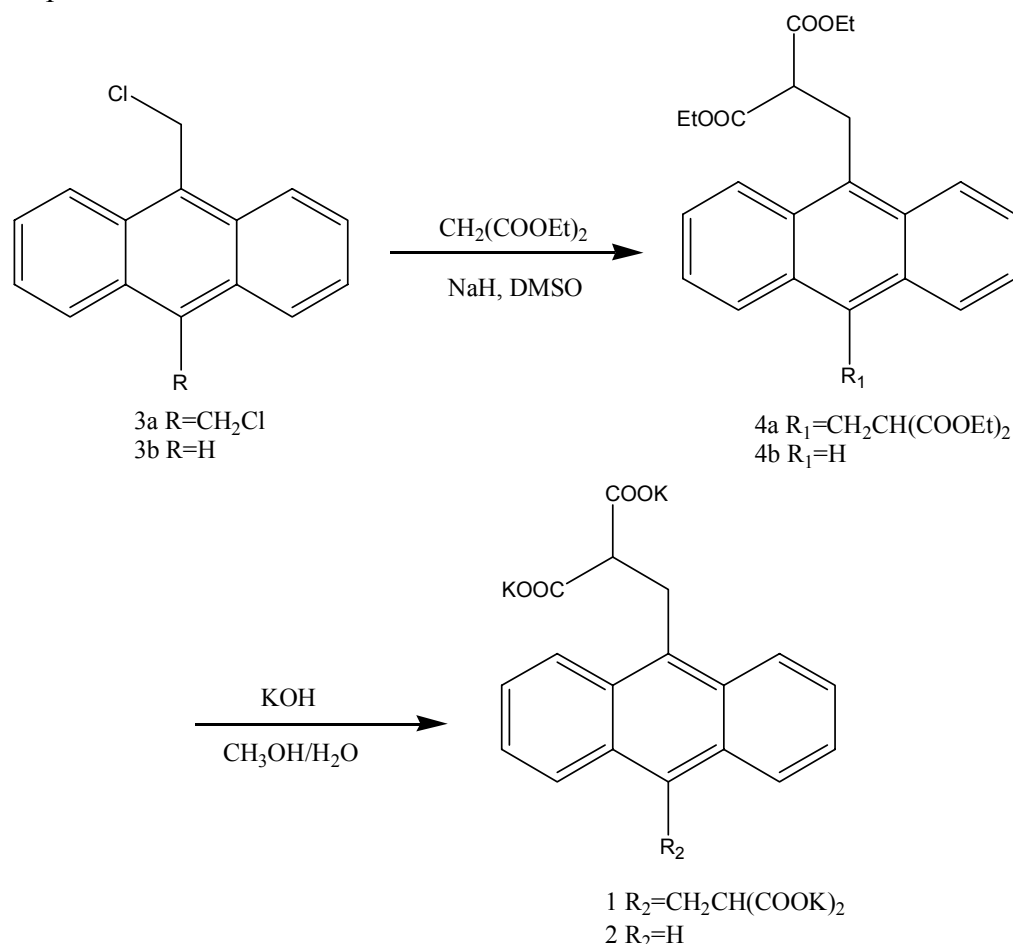

### Synthesis of **4a**

A suspended solution of sodium hydride (60% in mineral oil, 0.16g, 4.16 mmol) in 30 mL DMSO was added diethyl malonate (1.6g, 10.6mmol). After the solution was clear, **3a** (0.4g, 1.76 mmol) was added. The reaction mixture was refluxed for 5 hours, then cooled to room temperature. The reaction mixture was poured into 50 mL ice-cold HCl (0.04 M) aqueous solution, and the solid was collected. The solid was purified by flash chromatography (hexane/dichloromethane =1:9 v/v) to give **4a** as yellow solid (0.57 g, 62.5%). M.p.: 177°. <sup>1</sup>H-NMR (300 Hz, CDCl<sub>3</sub>): δ 8.32 (d, 4H), 7.51 (d, 4H), 4.30(d, 4H), 4.02 (m, 8H), 3.84 (t, 2H), 1.05 (m, 12H). MS(EI): 522 (M<sup>+</sup>).

### Synthesis of **4b**

**4b** was synthesized in the similar procedure as **4a** and obtained as yellow solid. Yield 63%. M.p.: 81°. <sup>1</sup>H-NMR (300 Hz, CDCl<sub>3</sub>): δ 8.39(s, 1H), 8.26(d, 2H), 8.02 (d, 2H), 7.55-7.43 (m, 4H), 4.31 (d, 2H), 4.13-3.96 (m, 4H), 3.87 (t, 1H), 1.05 (t, 6H). MS(EI): 350 (M<sup>+</sup>).

### Synthesis of **1**

A solution of **4a** (0.45g, 0.857 mmol) in 10 mL CH<sub>3</sub>OH and 10 mL H<sub>2</sub>O was added KOH (0.2 g, 3.58 mmol). The reaction mixture was refluxed overnight, then solvent was removed under vacuum. The residue was washed with 20

mL  $\text{CH}_2\text{Cl}_2$  and  $3 \times 5$  mL  $\text{CH}_3\text{OH}$  to give **1** as light yellow solid (0.46g, 95%). M.p > 300 °C.  $^1\text{H-NMR}$  (300Hz,  $\text{D}_2\text{O}$ ):  $\delta$  8.31(m, 4H), 7.47(m, 4H), 4.00(d, 4H), 3.41(t, 2H). HRMS(FAB, negative) Calc. for  $\text{C}_{22}\text{H}_{14}\text{O}_8\text{K}_3$ , [M-H peak]  $m/z=522.9605$ ; Found: 522.9600.

#### Synthesis of **2**

**2** was synthesized in similar procedure as **1** and obtained as light yellow solid. Yield, 90%. M.p > 300 °C.  $^1\text{H-NMR}$  (300 Hz,  $\text{D}_2\text{O}$ ):  $\delta$  8.32 (s, 1H), 8.23 (d, 2H), 7.94 (d, 2H), 7.36-7.46 (m, 4H), 3.95 (d, 2H), 3.38 (t, 1H). HRMS (FAB, negative) Calc. for  $\text{C}_{18}\text{H}_{12}\text{O}_4\text{K}$ , [M-H peak]  $m/z=331.0378$ ; Found: 331.0376.

The UV-Visible absorption and fluorescence emission responses of **1** and **2** upon addition of  $\text{Cu}^{2+}$

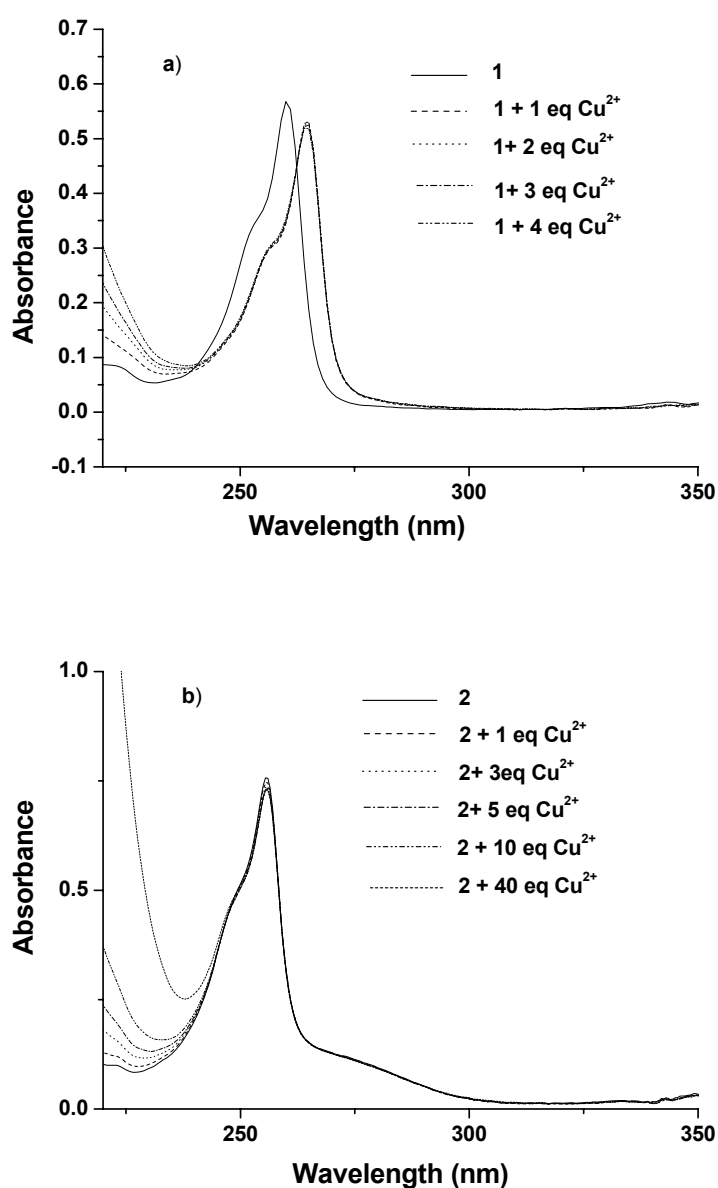

Figure S1. The UV-vis responses of **1** and **2** upon addition of  $\text{Cu}^{2+}$  a) **1** ( $5 \times 10^{-6}$  M); b) **2** ( $5 \times 10^{-6}$  M).

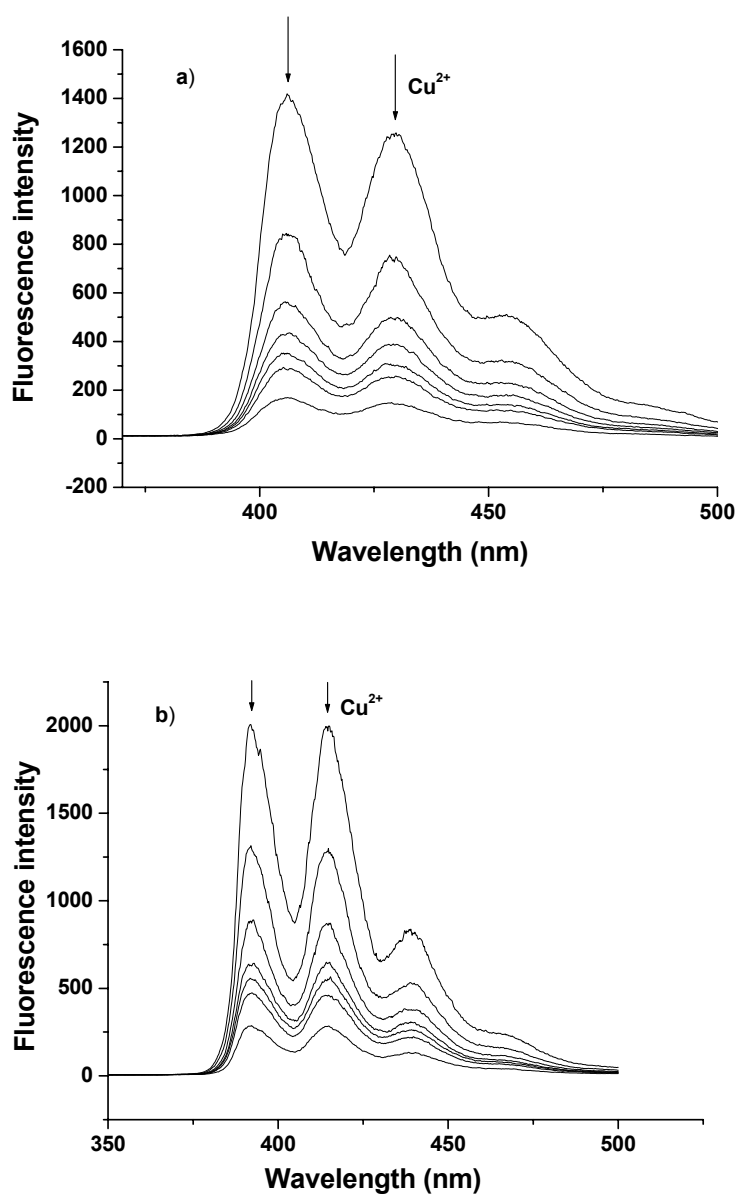

**Figure S2** The fluorescence emission responses of **1** and **2** upon addition of  $\text{Cu}^{2+}$  a) **1** ( $5 \times 10^{-7} \text{ M}$ ) with  $\text{Cu}^{2+}$  (0eq, 0.2eq, 0.4eq, 0.6eq, 0.8eq, 1eq, 2eq); b) **2** ( $5 \times 10^{-6} \text{ M}$ ) with  $\text{Cu}^{2+}$  (0eq, 1eq, 2eq, 3eq, 4eq, 5eq, 10eq)

The fluorescence emission responses of **2**\*Cu before and after addition of amino acids and peptides

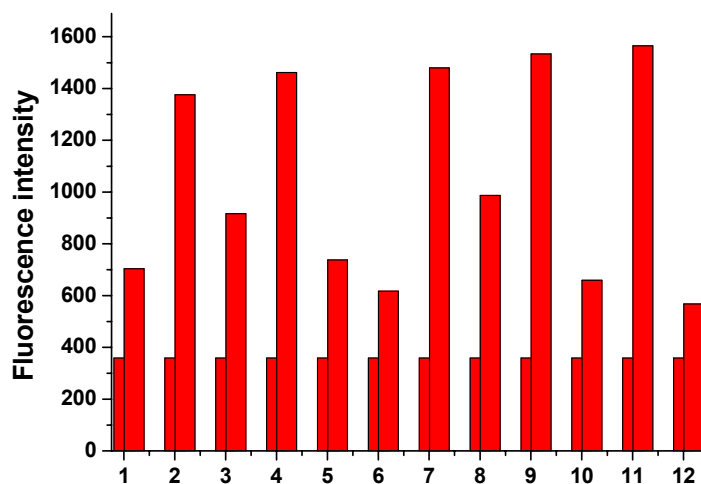

**Figure s3** Fluorescence intensity changes of **2**\*Cu<sup>2+</sup> (10<sup>-5</sup> M, aqueous solution) before and after the addition of 10 eq of amino acids and peptides: 1. L-glycine; 2. L-glutamic acid; 3. methionine; 4. L-arginine; 5. L-tyrosine; 6. L-tryptophan; 7. L-glutathione; 8. L-serine; 9. L-cysteine; 10. L-ornithine; 11. homocysteine; 12. L-histidine

The relationship of time vs fluorescence intensity of the solution after analytes are added to **1**\*Cu

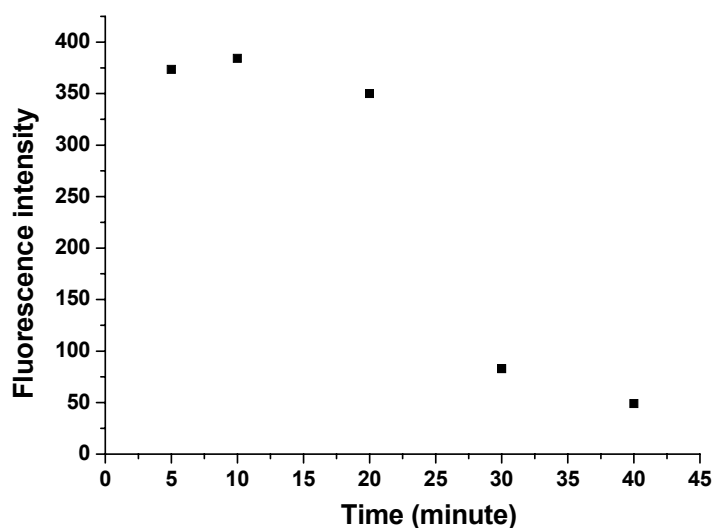

**Figure s4** The relationship of time vs fluorescence intensity of the solution upon addition of cysteine ( **1**\*Cu: 5×10<sup>-7</sup> M, cysteine: 5×10<sup>-6</sup> M)

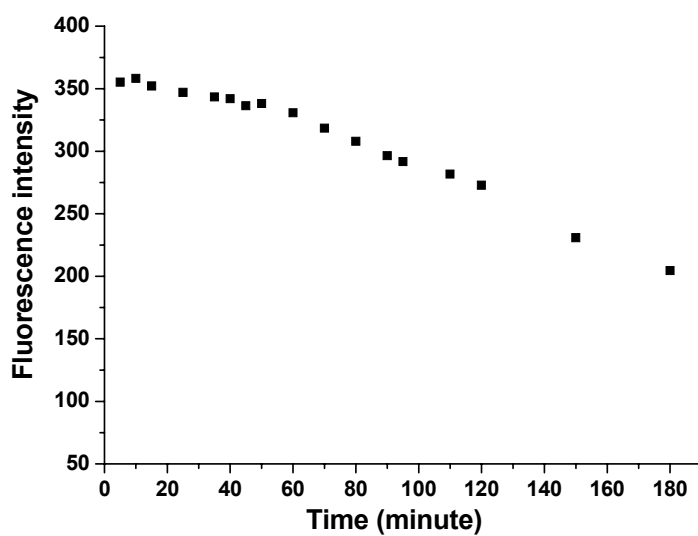

**Figure s5** The relationship of time vs fluorescence intensity of the solution upon addition of homocysteine (  $1^*Cu$ :  $5 \times 10^{-7}$  M, homocysteine:  $5 \times 10^{-6}$  M)

Absorption spectra of  $1^*Cu$  with the addition of cysteine.

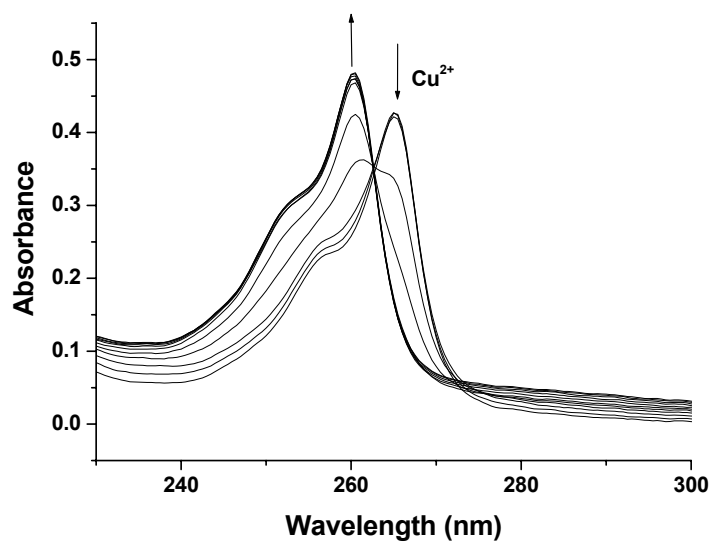

**Figure s6** The absorption response of  $1^*Cu$  ( $5 \times 10^{-6}$  M) with the addition of cysteine (0eq, 1eq, 2eq, 3eq, 4eq, 5eq, 6eq, 7eq, 8eq, 9eq, 10eq).

## Titration of **1**\*Cu with thiol-containing amino acids

Thiol-containing amino acids (cysteine and homocysteine) are used in the spectrofluorimetric titrations titration. The probe is formed *in situ* by adding 2 eq of  $\text{Cu}^{2+}$  to a aqueous solution of **1** ( $5 \times 10^{-7}$  M), then thiol-containing amino acids are added to the probe until a constant value of  $I_{\text{max}}$  is reached. The apparent binding constants are defined by the equations  $K = [\text{Cu}^*\text{S}]_{\text{tot}} / [1^*\text{Cu}]_{\text{tot}} [\text{S}]_{\text{tot}}$ , where  $[\text{Cu}^*\text{S}]_{\text{tot}}$ ,  $[1^*\text{Cu}]_{\text{tot}}$  and  $[\text{S}]_{\text{tot}}$  (substrate: amino acid) are the total concentration of  $\text{Cu}^*\text{S}$ , **1**\*Cu and S in all their protonated and deprotonated forms at a given pH in water solution, and 1:1 probe/substrate interaction are assumed.

The apparent binding constants are obtained from the following equation:<sup>[1]</sup>

$$F_0 / (F - F_0) = a / (K[S]) + a$$

Where  $F_0$  and  $F$  are the luminescence intensity of **1**\*Cu solution in the absence and presence of amino acid/peptide substrate;  $a$  is constant;  $K$  is the apparent binding constants.

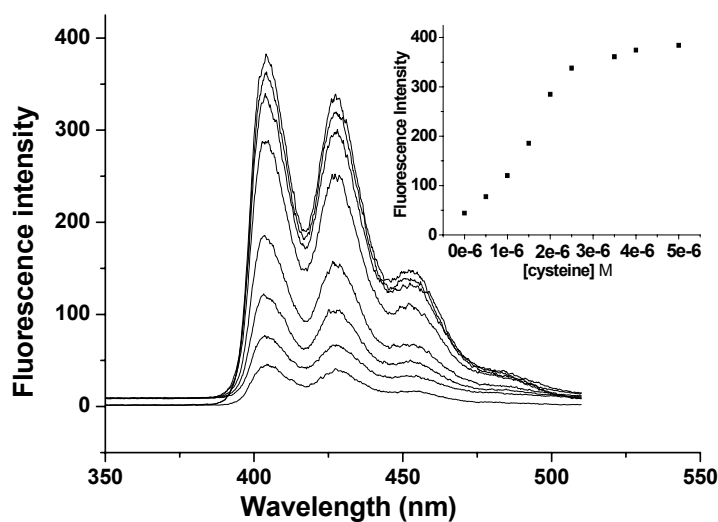

**Figure S7** Titration of **1**\*Cu ( $5 \times 10^{-7}$  M ) with cysteine in aqueous solution (pH=7). Inset: fluorescence intensity changes with the addition of cysteine.

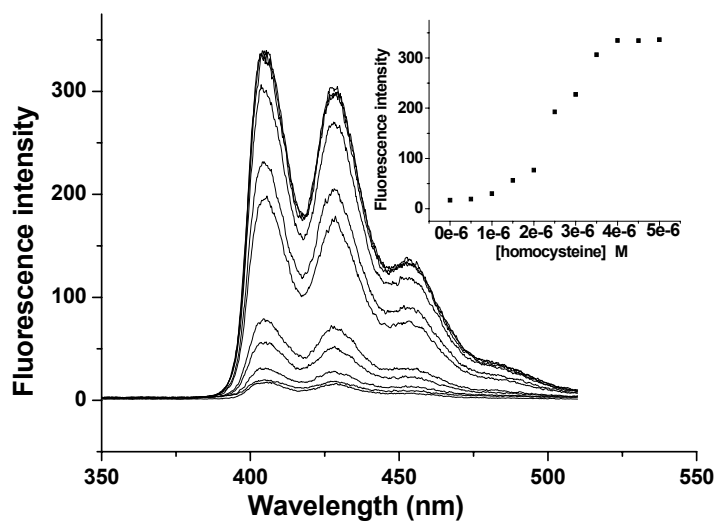

**Figure s8** Titration of **1\*Cu** ( $5 \times 10^{-7}$  M) with homocysteine in aqueous solution (pH=7). Inset: fluorescence intensity changes with the addition of homocysteine.

**Reference:**

1. "Comprehensive Supramolecular Chemistry" vol. 8, H.Tsukube ed. Chap. 10, p 425-482, Pergamon Press (1996)
